# Supplementary material
Source: Springer Nature journal article supplement (https://www.springermedizin.de/resource/supplementary/12955_2013_1318_MOESM3_ESM.pdf/9559548)

# Overall survival according to mobility score

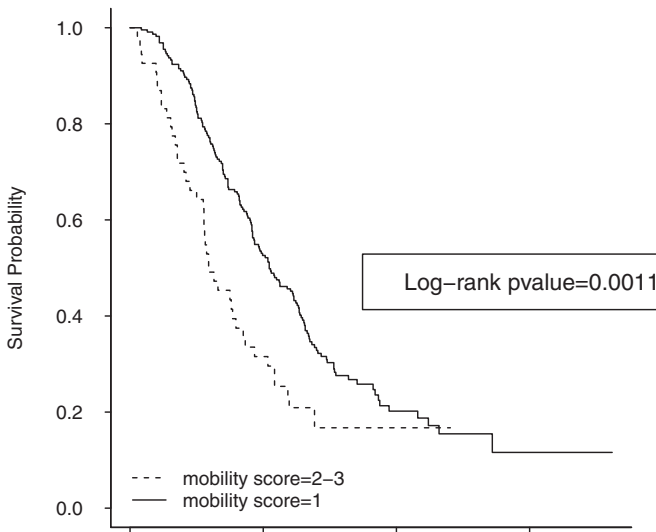

Number at risk

|                    |     |     |    |   |
|--------------------|-----|-----|----|---|
| mobility score=2-3 | 54  | 16  | 1  |   |
| mobility score=1   | 223 | 115 | 17 | 2 |

Supplement: MOESM3 [file 9559548]
